# Supplementary material
Source: publisher site journal article supplement (https://www.dovepress.com/article/527135)
Supplement: Supplementary file 1 [file 527135-Supplementary%20materials_2_1.docx]

**Supplementary Table 1: Raw Data of Dose- and Time-Dependent Effects of Monoiodoacetate-Induced Knee Osteoarthritis in Rats**

1. Knee diameter-lefts

| DAY3 | 0mg | 0.5mg | 1.0mg | 1.5mg | 2.0mg |
| --- | --- | --- | --- | --- | --- |
|  | 8.7 | 8.7 | 10 | 10 | 10.7 |
|  | 8.7 | 9.5 | 9.4 | 9.7 | 10.2 |
|  | 8.8 | 10.1 | 9.4 | 10.3 | 10.8 |
|  | 8.6 | 9.7 | 8.5 | 10.2 | 10.8 |
|  | 8.9 | 9.6 | 10.6 | 9.7 | 10.1 |
| DAY5 | 8.8 | 8.9 | 9.2 | 9.3 | 9.7 |
|  | 8.8 | 8.4 | 9.4 | 9.2 | 9.1 |
|  | 8.7 | 9.4 | 8.8 | 9.5 | 9.6 |
|  | 8.9 | 9.1 | 8.9 | 9.5 | 9.3 |
|  | 9 | 8.8 | 9.1 | 9.4 | 9.4 |
| DAY7 | 9 | 10 | 9 | 9.2 | 9.5 |
|  | 8.8 | 9.2 | 9.5 | 9 | 9.5 |
|  | 8.9 | 9.1 | 9.4 | 9.4 | 9.4 |
|  | 9.1 | 9.1 | 9.5 | 9.8 | 9.4 |
|  | 8.7 | 8.9 | 8.9 | 9.7 | 9.4 |
| DAY14 | 8.7 | 9 | 8.6 | 9.3 | 9.4 |
|  | 8.9 | 9.1 | 9.1 | 9.7 | 9.3 |
|  | 8.5 | 8.9 | 9.7 | 9.1 | 9.6 |
|  | 9.9 | 8.8 | 8.9 | 9.3 | 9.6 |
|  | 9 | 8.5 | 9.2 | 8.8 | 9.4 |
| DAY21 | 9 | 9.1 | 9.1 | 9 | 9.3 |
|  | 8.9 | 9.2 | 9.3 | 9.1 | 9.6 |
|  | 8.8 | 9.2 | 9.3 | 9.6 | 9.5 |
|  | 8.9 | 9.3 | 9.2 | 9.4 | 9.6 |
|  | 9 | 9.1 | 9.3 | 9.3 | 9.5 |
| DAY28 | 9.2 | 9.1 | 9.5 | 9.3 | 10.4 |
|  | 8.7 | 8.9 | 8.7 | 9.7 | 9.6 |
|  | 8.8 | 9.2 | 9.1 | 9.4 | 10.4 |
|  | 8.8 | 9.5 | 10 | 9.3 | 9.5 |
|  | 9 | 9.4 | 9.8 | 9.8 | 9.8 |

2. Hargreaves' paw flick test

| DAY3 | 0mg | 0.5mg | 1.0mg | 1.5mg | 2.0mg |
| --- | --- | --- | --- | --- | --- |
|  | 14.7 | 12.6 | 11.8 | 11 | 10.2 |
|  | 14.1 | 11.7 | 11.3 | 10.2 | 10.9 |
|  | 14.4 | 13.2 | 11.5 | 10.3 | 10.6 |
|  | 14.3 | 12.7 | 12.5 | 10.4 | 9.2 |
|  | 15 | 13.9 | 10.8 | 11.3 | 9.6 |
| DAY5 | 14.4 | 12.6 | 12 | 10.2 | 9.3 |
|  | 15.2 | 13.8 | 11.4 | 10.4 | 10.8 |
|  | 14.7 | 12.3 | 10.6 | 9.9 | 10.9 |
|  | 15.1 | 12.2 | 10.5 | 10.1 | 9.1 |
|  | 14.3 | 12 | 10.6 | 10.1 | 10.7 |
| DAY7 | 15.1 | 13.4 | 14.2 | 12.6 | 11.7 |
|  | 14.2 | 14.9 | 12 | 9.9 | 10.5 |
|  | 14.6 | 15.1 | 14.6 | 11.9 | 12.2 |
|  | 14.3 | 15.4 | 10.9 | 11.7 | 11.2 |
|  | 15.2 | 14.8 | 13.2 | 12.9 | 11 |
| DAY14 | 14.8 | 14.1 | 12.7 | 10.7 | 10.3 |
|  | 15.6 | 12.1 | 13.2 | 12.3 | 11.6 |
|  | 15.1 | 13 | 10.9 | 12 | 10.5 |
|  | 15.2 | 12.9 | 11.4 | 11.4 | 10.4 |
|  | 14.9 | 13.4 | 12.1 | 11.4 | 11.7 |
| DAY21 | 15.4 | 14.7 | 13.3 | 11.8 | 11.9 |
|  | 15.3 | 15.1 | 12.4 | 11.8 | 10.9 |
|  | 15.2 | 14.8 | 12.8 | 12.3 | 10.4 |
|  | 14.9 | 15.4 | 12.9 | 12 | 11.1 |
|  | 15.6 | 11.4 | 13.6 | 10.9 | 11.6 |
| DAY28 | 14.9 | 13.4 | 11 | 12.6 | 12.2 |
|  | 15.2 | 15.1 | 12.6 | 14.6 | 10.3 |
|  | 15.7 | 14.1 | 13.2 | 10.3 | 10.7 |
|  | 15.5 | 13 | 12.9 | 11 | 12.1 |
|  | 15.3 | 12.9 | 12.5 | 10.4 | 10.4 |

3. Von Frey test

| DAY3 | 0mg | 0.5mg | 1.0mg | 1.5mg | 2.0mg |
| --- | --- | --- | --- | --- | --- |
|  | 37.5 | 30.1 | 41.3 | 27.8 | 25 |
|  | 38.3 | 34 | 29.5 | 28.9 | 28.3 |
|  | 39.5 | 33.5 | 29 | 24.2 | 24 |
|  | 36 | 32.2 | 34.2 | 17.7 | 23 |
|  | 41.5 | 47.7 | 33.1 | 27.7 | 20.9 |
| DAY5 | 41.2 | 30.3 | 27 | 20.4 | 16.2 |
|  | 31 | 29.9 | 24.2 | 17 | 26.1 |
|  | 37.5 | 23.8 | 22.1 | 23.1 | 12.4 |
|  | 39.8 | 24.6 | 27.5 | 26.9 | 19.4 |
|  | 30.2 | 37.3 | 20 | 18.9 | 20.7 |
| DAY7 | 36.1 | 20.8 | 23.1 | 17.1 | 17.5 |
|  | 42.3 | 21.9 | 22 | 23.9 | 19.2 |
|  | 35.8 | 25 | 22.3 | 31.1 | 28.9 |
|  | 35.2 | 29.5 | 31.2 | 24.3 | 12.5 |
|  | 39.3 | 23.2 | 22.8 | 26 | 20.9 |
| DAY14 | 36.9 | 37.3 | 30.5 | 31.8 | 20.1 |
|  | 36.5 | 32 | 32.9 | 27.2 | 28.3 |
|  | 29.1 | 32.4 | 38.6 | 25.6 | 35.2 |
|  | 32.3 | 29.4 | 32.8 | 26.1 | 23.3 |
|  | 23.7 | 35.8 | 29.8 | 28.5 | 26.9 |
| DAY21 | 34.1 | 26.7 | 22 | 15.3 | 15.8 |
|  | 38 | 27.3 | 26.7 | 15.7 | 14.9 |
|  | 27.5 | 20.5 | 21.3 | 24.2 | 20.8 |
|  | 32.4 | 21.3 | 25.2 | 23 | 25.7 |
|  | 33.6 | 26.7 | 25.2 | 28.7 | 26.7 |
| DAY28 | 27.4 | 18.3 | 11.4 | 13.2 | 10 |
|  | 29.5 | 27.2 | 19.7 | 12.3 | 11.9 |
|  | 33.6 | 18.2 | 16.3 | 14.7 | 10.9 |
|  | 24.9 | 21 | 19.4 | 10 | 11.1 |
|  | 23.5 | 11.9 | 15 | 10.8 | 14.1 |

4. Weight-bearing

| DAY3 | 0mg | 0.5mg | 1.0mg | 1.5mg | 2.0mg |
| --- | --- | --- | --- | --- | --- |
|  | 52.76641 | 48.46757 | 46.8786 | 45.0223 | 42.15204 |
|  | 51.3205 | 47.89468 | 46.35662 | 44.4509 | 42.0225 |
|  | 52.83432 | 49.13128 | 46.4735 | 44.70458 | 41.54894 |
|  | 50.58588 | 48.70538 | 46.85357 | 44.60399 | 42.56154 |
|  | 51.33211 | 48.47869 | 46.47713 | 44.69161 | 42.36066 |
| DAY5 | 50.51716 | 44.01633 | 42.28021 | 40.10054 | 38.15868 |
|  | 50.59858 | 42.84165 | 42.15135 | 40.8501 | 38.63316 |
|  | 50.90389 | 43.70723 | 42.19377 | 41.04484 | 38.15524 |
|  | 51.6163 | 43.41352 | 42.98547 | 40.22306 | 38.6015 |
|  | 52.71355 | 43.73125 | 42.55946 | 40.45597 | 38.72718 |
| DAY7 | 51.04312 | 42.98927 | 41.09431 | 38.64096 | 35.38322 |
|  | 53.16768 | 42.31696 | 40.11546 | 39.39789 | 35.66839 |
|  | 46.29213 | 42.19531 | 39.92217 | 38.62911 | 35.82513 |
|  | 52.24471 | 42.76038 | 40.92646 | 38.71299 | 33.20398 |
|  | 56.55681 | 42.01392 | 40.55408 | 38.35442 | 36.16903 |
| DAY14 | 51.28827 | 44.14804 | 43.57603 | 40.54968 | 40.83226 |
|  | 51.88173 | 43.91086 | 43.46365 | 41.7226 | 41.22152 |
|  | 51.72599 | 44.26915 | 43.7009 | 41.13951 | 40.56809 |
|  | 51.61742 | 44.0709 | 43.52533 | 41.67888 | 40.22331 |
|  | 51.72101 | 44.13873 | 43.63484 | 41.58328 | 39.44749 |
| DAY21 | 49.69014 | 40.82008 | 38.12109 | 34.64325 | 32.11193 |
|  | 51.10778 | 40.44104 | 37.84112 | 34.71529 | 32.44078 |
|  | 50.99877 | 40.50108 | 37.73044 | 34.88159 | 32.10251 |
|  | 50.82688 | 40.32472 | 37.66287 | 34.07956 | 32.14007 |
|  | 49.67175 | 41.09904 | 37.58455 | 34.94169 | 32.22341 |
| DAY28 | 47.88906 | 36.45699 | 33.54073 | 28.04503 | 25.28507 |
|  | 49.47796 | 36.03766 | 33.49749 | 28.37732 | 25.58718 |
|  | 49.54312 | 36.38861 | 33.90337 | 28.74183 | 26.89521 |
|  | 48.93105 | 36.53465 | 33.22154 | 27.99069 | 25.11856 |
|  | 49.88924 | 36.93491 | 33.78136 | 28.27101 | 24.72652 |

5. Mankins score

| DAY3 | 0mg | 0.5mg | 1.0mg | 1.5mg | 2.0mg |
| --- | --- | --- | --- | --- | --- |
|  | 1 | 1.667 | 1.667 | 2.667 | 2.667 |
|  | 1.333 | 1.667 | 2.333 | 2.667 | 3.333 |
|  | 1.667 | 1.667 | 1.333 | 3 | 2.667 |
|  | 1.333 | 2.333 | 2.667 | 2.667 | 3.333 |
|  | 1 | 2 | 2.667 | 2.333 | 3.667 |
| DAY5 | 1 | 2.667 | 4.333 | 3.667 | 4.333 |
|  | 1.333 | 2.333 | 2.667 | 4.667 | 3.667 |
|  | 1.667 | 2.333 | 2.667 | 3 | 3.333 |
|  | 1.333 | 3.333 | 2.333 | 3.667 | 3.333 |
|  | 1 | 4.333 | 3 | 3.333 | 4 |
| DAY7 | 1 | 3.333 | 3.333 | 4 | 5 |
|  | 1.333 | 4.333 | 2.667 | 5.667 | 4.667 |
|  | 1.667 | 4 | 4.333 | 3 | 4 |
|  | 1.333 | 4.333 | 3.333 | 4.667 | 3.333 |
|  | 1 | 3 | 5 | 5 | 4.333 |
| DAY14 | 1 | 3.333 | 4 | 4 | 5.333 |
|  | 1.333 | 3.333 | 4.333 | 4.667 | 4.333 |
|  | 1.667 | 3.667 | 4.333 | 3.667 | 4 |
|  | 1.333 | 4 | 4.667 | 5.667 | 4.667 |
|  | 1 | 3.667 | 2.667 | 4 | 5.667 |
| DAY21 | 1 | 5.667 | 6 | 7.333 | 6.333 |
|  | 1.333 | 4.333 | 5.667 | 6 | 7 |
|  | 1.667 | 4.667 | 6.333 | 7.667 | 7 |
|  | 1.333 | 5 | 5 | 6.333 | 6.667 |
|  | 1 | 5.333 | 5 | 4.667 | 8.333 |
| DAY28 | 1 | 8 | 8.667 | 8.667 | 9.333 |
|  | 1.333 | 8 | 10.667 | 7.667 | 9.667 |
|  | 1.667 | 8.333 | 9.667 | 9.667 | 8 |
|  | 1.333 | 7.667 | 7.667 | 9 | 10.333 |
|  | 1 | 8.333 | 6.333 | 9.667 | 9 |

6. OARSI score

| DAY3 | 0mg | 0.5mg | 1.0mg | 1.5mg | 2.0mg |
| --- | --- | --- | --- | --- | --- |
|  | 2.333333 | 1.333333 | 1.666667 | 2.666667 | 3.666667 |
|  | 1.666667 | 1.666667 | 2.666667 | 3.333333 | 4 |
|  | 2.666667 | 1.666667 | 2 | 3.666667 | 4 |
|  | 1.666667 | 2.333333 | 2 | 3.333333 | 3.666667 |
|  | 1.333333 | 2 | 2.666667 | 2.666667 | 4 |
| DAY5 | 2.333333 | 3 | 4.667 | 4.667 | 5.333 |
|  | 1.666667 | 3.667 | 3.333 | 5.333 | 5.667 |
|  | 2.666667 | 4.333 | 3.333 | 4.333 | 4.333 |
|  | 1.666667 | 5 | 3 | 4.333 | 5.333 |
|  | 1.333333 | 5.333 | 4.333 | 4 | 5.667 |
| DAY7 | 2.333333 | 4 | 4.666667 | 5.666667 | 6.333333 |
|  | 1.666667 | 5 | 3.333333 | 7.333333 | 6.333333 |
|  | 2.666667 | 4.666667 | 6 | 4.666667 | 7 |
|  | 1.666667 | 5.666667 | 5.333333 | 5.333333 | 6.333333 |
|  | 1.333333 | 3 | 5.333333 | 6.333333 | 7.666667 |
| DAY14 | 2.333333 | 4.666667 | 6 | 5.666667 | 6.666667 |
|  | 1.666667 | 5 | 5.666667 | 7 | 8 |
|  | 2.666667 | 5.333333 | 6.333333 | 7.333333 | 7.666667 |
|  | 1.666667 | 6 | 7 | 7.333333 | 8 |
|  | 1.333333 | 5.333333 | 5 | 4.333333 | 10 |
| DAY21 | 2.333333 | 7.333 | 8.333 | 11.333 | 11.667 |
|  | 1.666667 | 6.333 | 7 | 8.333 | 11 |
|  | 2.666667 | 5.333 | 8.333 | 11.667 | 9.667 |
|  | 1.666667 | 7 | 8.667 | 9.667 | 11.333 |
|  | 1.333333 | 7.333 | 7 | 7.333 | 12.667 |
| DAY28 | 2.333333 | 12 | 13 | 12.33333 | 14.66667 |
|  | 1.666667 | 12.33333 | 15.33333 | 13.33333 | 14.33333 |
|  | 2.666667 | 9.666667 | 15.66667 | 14.33333 | 14.33333 |
|  | 1.666667 | 8.333333 | 13 | 13.66667 | 16.33333 |
|  | 1.333333 | 8 | 11 | 13.66667 | 15.33333 |

7. IL-1β in the serum

| DAY3 | 0mg | 0.5mg | 1.0mg | 1.5mg | 2.0mg |
| --- | --- | --- | --- | --- | --- |
|  | 8.812636 | 15.78431 | 16.329 | 17.63617 | 19.58333 |
|  | 10.44662 | 15.13072 | 16.002 | 17.63617 | 18.41667 |
|  | 10.01089 | 15.89325 | 16.111 | 18.28976 | 18.08333 |
|  | 9.466231 | 14.80392 | 16.002 | 18.72549 | 18.08333 |
|  | 11.20915 | 15.02179 | 16.765 | 18.83442 | 18.91667 |
| DAY5 | 8.812636 | 19.92375 | 18.508 | 21.25 | 20.41667 |
|  | 10.44662 | 19.59695 | 19.706 | 21.41667 | 20.25 |
|  | 10.01089 | 18.28976 | 18.508 | 20.91667 | 20.08333 |
|  | 9.466231 | 19.59695 | 20.251 | 20.25 | 18.75 |
|  | 11.20915 | 18.18083 | 19.924 | 20.25 | 18.28976 |
| DAY7 | 8.812636 | 22.32026 | 23.519 | 22.08333 | 23.58333 |
|  | 10.44662 | 20.79521 | 22.756 | 23.58333 | 24.08333 |
|  | 10.01089 | 21.88453 | 21.34 | 20.25 | 24.08333 |
|  | 9.466231 | 22.42919 | 20.577 | 22.25 | 23.91667 |
|  | 11.20915 | 21.7756 | 22.429 | 22.41667 | 23.41667 |
| DAY14 | 8.812636 | 21.91667 | 21.776 | 22.75 | 23.73638 |
|  | 10.44662 | 21.91667 | 19.815 | 23.41667 | 21.55773 |
|  | 10.01089 | 21.58333 | 21.34 | 23.41667 | 22.21133 |
|  | 9.466231 | 21.41667 | 20.142 | 23.75 | 22.32026 |
|  | 11.20915 | 20.58333 | 21.993 | 23.25 | 23.95425 |
| DAY21 | 8.812636 | 24.60784 | 26.024 | 26.25 | 30.58333 |
|  | 10.44662 | 24.06318 | 25.37 | 25.91667 | 29.25 |
|  | 10.01089 | 24.17211 | 27.44 | 26.91667 | 30.75 |
|  | 9.466231 | 24.08333 | 26.895 | 26.58333 | 31.41667 |
|  | 11.20915 | 23.41667 | 25.37 | 26.08333 | 30.11905 |
| DAY28 | 8.812636 | 24.75 | 26.25 | 31.25272 | 32.61905 |
|  | 10.44662 | 23.25 | 25.917 | 29.5098 | 32.02381 |
|  | 10.01089 | 25.25 | 26.917 | 30.81699 | 32.2619 |
|  | 9.466231 | 24.75 | 26.583 | 29.18301 | 32.85714 |
|  | 11.20915 | 24.91667 | 26.083 | 31.79739 | 31.42857 |

8. IL-1β in the joint

| DAY3 | 0mg | 0.5mg | 1.0mg | 1.5mg | 2.0mg |
| --- | --- | --- | --- | --- | --- |
|  | 12.51634 | 13.16993 | 15.417 | 16.43791 | 17.63617 |
|  | 12.7342 | 14.80392 | 15.917 | 15.34858 | 17.4183 |
|  | 12.08061 | 13.7146 | 15.25 | 16.65577 | 18.28976 |
|  | 11.20915 | 14.47712 | 16.75 | 15.78431 | 16.98257 |
|  | 11.97168 | 13.27887 | 16.083 | 14.25926 | 17.20044 |
| DAY5 | 12.51634 | 16.75 | 27.738 | 25.75 | 25.11905 |
|  | 12.7342 | 17.75 | 28.214 | 26.75 | 28.69048 |
|  | 12.08061 | 16.08333 | 27.976 | 27.25 | 28.21429 |
|  | 11.20915 | 19.91667 | 27.381 | 26.75 | 29.04762 |
|  | 11.97168 | 16.41667 | 27.619 | 26.41667 | 28.69048 |
| DAY7 | 12.51634 | 30 | 33.095 | 32.97619 | 35.47619 |
|  | 12.7342 | 29.52381 | 33.571 | 32.2619 | 35.59524 |
|  | 12.08061 | 29.40476 | 33.333 | 32.61905 | 34.28571 |
|  | 11.20915 | 29.88095 | 33.81 | 32.97619 | 34.40476 |
|  | 11.97168 | 30.11905 | 33.971 | 32.14286 | 35.71429 |
| DAY14 | 12.51634 | 27.91667 | 26.667 | 29.85294 | 32.5 |
|  | 12.7342 | 28.91667 | 25.952 | 29.88095 | 32.5 |
|  | 12.08061 | 27.08333 | 26.905 | 29.7619 | 32.7381 |
|  | 11.20915 | 28.58333 | 27.143 | 30.59524 | 31.54762 |
|  | 11.97168 | 27.25 | 26.905 | 30.59524 | 31.42857 |
| DAY21 | 12.51634 | 32.97619 | 35 | 35.95238 | 37.38095 |
|  | 12.7342 | 33.21429 | 35.357 | 36.91176 | 37.2619 |
|  | 12.08061 | 31.78571 | 35.833 | 35.83333 | 37.14286 |
|  | 11.20915 | 33.69048 | 35.595 | 35.35714 | 37.14286 |
|  | 11.97168 | 33.80952 | 36.912 | 35.11905 | 37.61905 |
| DAY28 | 12.51634 | 39.70588 | 44.118 | 47.94118 | 49.70588 |
|  | 12.7342 | 37.64706 | 44.853 | 47.94118 | 52.35294 |
|  | 12.08061 | 42.94118 | 44.265 | 46.47059 | 48.82353 |
|  | 11.20915 | 39.55882 | 43.824 | 48.23529 | 48.97059 |
|  | 11.97168 | 39.11765 | 44.559 | 46.91176 | 51.17647 |

9. IL-10 in the serum

| DAY3 | 0mg | 0.5mg | 1.0mg | 1.5mg | 2.0mg |
| --- | --- | --- | --- | --- | --- |
|  | 128.2143 | 120 | 118.3333 | 111.4286 | 116.4286 |
|  | 128.9286 | 121.7857 | 123.9286 | 115.3571 | 110.3571 |
|  | 129.6429 | 125 | 122.1429 | 113.2143 | 111.7857 |
|  | 129.1667 | 124.6429 | 120.8333 | 115.3571 | 116.4286 |
|  | 130.3571 | 122.1429 | 122.0833 | 114.6429 | 115.7143 |
| DAY5 | 128.2143 | 104.6429 | 101.7857 | 100 | 91.42857 |
|  | 128.9286 | 102.5 | 101.7857 | 99.28571 | 97.85714 |
|  | 129.6429 | 106.7857 | 101.0714 | 100.3571 | 94.28571 |
|  | 129.1667 | 106.7857 | 102.1429 | 101.4286 | 97.85714 |
|  | 130.3571 | 105.7143 | 102.5 | 101.7857 | 96.78571 |
| DAY7 | 128.2143 | 101.7857 | 97.5 | 96.78571 | 94.28571 |
|  | 128.9286 | 101.7857 | 98.92857 | 95.71429 | 90 |
|  | 129.6429 | 101.0714 | 92.85714 | 89.28571 | 97.5 |
|  | 129.1667 | 102.1429 | 92.5 | 92.5 | 91.78571 |
|  | 130.3571 | 105.3571 | 88.21429 | 93.92857 | 95.71429 |
| DAY14 | 128.2143 | 108.9286 | 115.3571 | 107.5 | 103.5714 |
|  | 128.9286 | 108.2143 | 115 | 112.1429 | 102.5 |
|  | 129.6429 | 108.2143 | 105 | 111.4286 | 104.2857 |
|  | 129.1667 | 109.6429 | 117.5 | 113.2143 | 103.2143 |
|  | 130.3571 | 105.7143 | 112.5 | 116.4286 | 104.6429 |
| DAY21 | 128.2143 | 86.31206 | 75.31915 | 70.35461 | 74.25532 |
|  | 128.9286 | 78.51064 | 71.41844 | 72.48227 | 69.29078 |
|  | 129.6429 | 81.34752 | 76.02837 | 74.25532 | 73.19149 |
|  | 129.1667 | 86.31206 | 72.48227 | 71.41844 | 73.90071 |
|  | 130.3571 | 82.76596 | 73.5461 | 72.12766 | 68.58156 |
| DAY28 | 128.2143 | 76.73759 | 66.80851 | 59.00709 | 51.91489 |
|  | 128.9286 | 77.44681 | 67.51773 | 59.00709 | 51.20567 |
|  | 129.6429 | 77.0922 | 66.4539 | 59.00709 | 51.56028 |
|  | 129.1667 | 79.21986 | 68.22695 | 58.65248 | 52.2695 |
|  | 130.3571 | 74.60993 | 65.39007 | 60.42553 | 51.56028 |

10. IL-10 in the joint

| DAY3 | 0mg | 0.5mg | 1.0mg | 1.5mg | 2.0mg |
| --- | --- | --- | --- | --- | --- |
|  | 132.0833 | 115 | 110 | 102.9167 | 105.4167 |
|  | 131.0714 | 114.6429 | 111.25 | 101.25 | 104.1667 |
|  | 134.1667 | 116.4286 | 107.9167 | 99.16667 | 102.0833 |
|  | 133.2143 | 116.0714 | 112.9167 | 102.5 | 107.5 |
|  | 131.0357 | 114.6429 | 118.3333 | 102.5 | 102.0833 |
| DAY5 | 132.0833 | 99.58333 | 93.75 | 99.16667 | 86.42857 |
|  | 131.0714 | 99.16667 | 94.16667 | 96.25 | 88.57143 |
|  | 134.1667 | 99.28571 | 94.16667 | 97.91667 | 87.5 |
|  | 133.2143 | 101.0714 | 94.58333 | 97.91667 | 87.14286 |
|  | 131.0357 | 100.3571 | 94.16667 | 97.08333 | 87.85714 |
| DAY7 | 132.0833 | 86.07143 | 85 | 83.33333 | 81.66667 |
|  | 131.0714 | 86.78571 | 85.41667 | 82.5 | 82.08333 |
|  | 134.1667 | 84.64286 | 86.66667 | 80.83333 | 80 |
|  | 133.2143 | 85.35714 | 87.08333 | 82.5 | 83.75 |
|  | 131.0357 | 89.64286 | 85.41667 | 82.91667 | 80.41667 |
| DAY14 | 132.0833 | 94.58333 | 91.66667 | 89.16667 | 89.16667 |
|  | 131.0714 | 95 | 91.66667 | 89.16667 | 88.33333 |
|  | 134.1667 | 94.58333 | 92.08333 | 89.16667 | 88.75 |
|  | 133.2143 | 93.33333 | 91.25 | 90.83333 | 89.58333 |
|  | 131.0357 | 92.91667 | 92.08333 | 91.66667 | 88.75 |
| DAY21 | 132.0833 | 85.41667 | 80 | 79.16667 | 78.75 |
|  | 131.0714 | 85.83333 | 82.85714 | 79.58333 | 78.75 |
|  | 134.1667 | 81.07143 | 85.41667 | 81.25 | 77.08333 |
|  | 133.2143 | 87.5 | 81.42857 | 79.16667 | 78.75 |
|  | 131.0357 | 83.75 | 82.5 | 80 | 77.14286 |
| DAY28 | 132.0833 | 72.85714 | 71.66667 | 50.35714 | 44.64286 |
|  | 131.0714 | 71.42857 | 66.78571 | 50 | 44.64286 |
|  | 134.1667 | 72.14286 | 70.35714 | 47.5 | 49.28571 |
|  | 133.2143 | 71.78571 | 67.85714 | 49.28571 | 45 |
|  | 131.0357 | 68.57143 | 68.57143 | 51.78571 | 43.57143 |
